# Supplementary material for: The Association of Sex with Unplanned Cardiac Readmissions following Percutaneous Coronary Intervention in Australia: Results from a Multicentre Outcomes Registry (GenesisCare Cardiovascular Outcomes Registry)
Source: MDPI journal article supplement (doi:10.3390/jcm11226866), 2022-11-21
Supplement: s1 [file s1]

**Supplementary Table S1: Patient Characteristics by sex and age**

| Factor                                | Age <55yr              |                       |        | Age 55-74 yrs          |                        |        | Age ≥75 yrs             |                         |        |
|---------------------------------------|------------------------|-----------------------|--------|------------------------|------------------------|--------|-------------------------|-------------------------|--------|
|                                       | Male                   | Female                | p      | Male                   | Female                 | p      | Male                    | Female                  | p      |
| N                                     | 1192                   | 221                   |        | 6770                   | 1790                   |        | 2715                    | 1286                    |        |
| Age (in yr), mean (SD)                | 49.6 (4.5)<br>(n=1192) | 50.4 (4.0)<br>(n=221) | 0.015  | 66.0 (5.3)<br>(n=6770) | 67.3 (5.2)<br>(n=1790) | <0.001 | 80.6 (4.2)<br>(n=2715)  | 81.5 (4.5)<br>(n=1286)  | <0.001 |
| <b>Risk Factors</b>                   |                        |                       |        |                        |                        |        |                         |                         |        |
| Diabetes                              | 214 (18.0%)            | 59 (26.9%)            | 0.002  | 1687 (25.1%)           | 440 (24.8%)            | 0.77   | 719 (26.7%)             | 309 (24.3%)             | 0.10   |
| Hypertension                          | 641 (54.6%)            | 128 (58.7%)           | 0.26   | 4779 (71.5%)           | 1363 (76.8%)           | <0.001 | 2155 (80.6%)            | 1115 (87.8%)            | <0.001 |
| Hypercholesterolemia (Chl>5.2/on Med) | 942 (83.9%)            | 177 (84.7%)           | 0.77   | 5578 (86.6%)           | 1512 (89.4%)           | 0.002  | 2152 (85.3%)            | 1058 (88.6%)            | 0.006  |
| Family history CAD                    | 584 (52.7%)            | 104 (50.7%)           | 0.60   | 2584 (42.3%)           | 797 (49.5%)            | <0.001 | 646 (28.4%)             | 342 (31.0%)             | 0.13   |
| Chronic HF                            | 7 (0.6%)               | 2 (0.9%)              | 0.59   | 238 (3.6%)             | 64 (3.7%)              | 0.90   | 266 (10.1%)             | 131 (10.5%)             | 0.72   |
| Current HF <2wks                      | 9 (0.8%)               | 3 (1.4%)              | 0.36   | 158 (2.4%)             | 48 (2.8%)              | 0.38   | 174 (6.6%)              | 89 (7.1%)               | 0.57   |
| Smoking history                       |                        |                       |        |                        |                        |        |                         |                         |        |
| Never smoked                          | 480 (41.4%)            | 82 (38.9%)            | 0.49   | 2564 (39.6%)           | 960 (56.5%)            | <0.001 | 1040 (41.7%)            | 838 (70.7%)             | <0.001 |
| Previous smoker                       | 433 (37.3%)            | 74 (35.1%)            | 0.53   | 3306 (51.1%)           | 589 (34.7%)            | <0.001 | 1393 (55.9%)            | 325 (27.4%)             | <0.001 |
| Current smoker                        | 247 (21.3%)            | 55 (26.1%)            | 0.12   | 601 (9.3%)             | 150 (8.8%)             | 0.56   | 61 (2.4%)               | 23 (1.9%)               | 0.34   |
| BMI (kg/m <sup>2</sup> ), mean (SD)   | 30.3 (4.7)<br>(n=1101) | 30.7 (6.8)<br>(n=203) | 0.32   | 29.4 (4.7)<br>(n=6197) | 29.2 (5.9)<br>(n=1646) | 0.25   | 27.5 (4.2)<br>(n=2452)  | 27.5 (5.2)<br>(n=1169)  | 0.96   |
| Previous MI                           | 220 (18.9%)            | 31 (14.4%)            | 0.12   | 1516 (22.9%)           | 282 (16.1%)            | <0.001 | 760 (28.7%)             | 289 (23.1%)             | <0.001 |
| Previous PCI                          | 312 (26.5%)            | 59 (27.1%)            | 0.86   | 2294 (34.1%)           | 488 (27.5%)            | <0.001 | 1035 (38.6%)            | 391 (30.7%)             | <0.001 |
| Previous PVD                          | 14 (1.2%)              | 11 (5.1%)             | <0.001 | 396 (6.0%)             | 83 (4.7%)              | 0.045  | 356 (13.5%)             | 173 (13.8%)             | 0.83   |
| Previous CeVD                         | 29 (2.5%)              | 5 (2.3%)              | 0.91   | 360 (5.5%)             | 117 (6.7%)             | 0.047  | 302 (11.5%)             | 150 (12.0%)             | 0.65   |
| Previous CABG                         | 44 (3.7%)              | 8 (3.7%)              | 0.97   | 704 (10.5%)            | 118 (6.6%)             | <0.001 | 520 (19.3%)             | 117 (9.2%)              | <0.001 |
| Renal dysfunction <sup>1</sup>        | 22 (2.1%)              | 6 (3.1%)              | 0.36   | 243 (4.1%)             | 68 (4.3%)              | 0.75   | 271 (11.3%)             | 96 (8.2%)               | 0.006  |
| Atrial fibrillation                   | 30 (3.5%)              | 8 (4.9%)              | 0.37   | 598 (11.2%)            | 138 (9.9%)             | 0.15   | 525 (24.3%)             | 255 (25.8%)             | 0.35   |
| Ejection fraction, mean (SD)          | 57.7 (9.1)<br>(n=1006) | 57.8 (9.7)<br>(n=182) | 0.87   | 57.2 (9.6)<br>(n=5627) | 58.9 (9.7)<br>(n=1494) | <0.001 | 54.4 (11.4)<br>(n=2138) | 56.9 (10.2)<br>(n=1082) | <0.001 |
| Cardiogenic Shock                     | 4 (0.3%)               | 1 (0.5%)              | 0.78   | 14 (0.2%)              | 8 (0.5%)               | 0.072  | 10 (0.4%)               | 6 (0.5%)                | 0.65   |
| Clinical presentation                 |                        |                       |        |                        |                        |        |                         |                         |        |
| Elective                              | 515 (44.4%)            | 89 (41.2%)            | 0.39   | 3799 (58.0%)           | 991 (58.1%)            | 0.97   | 1416 (54.6%)            | 607 (48.9%)             | <0.001 |
| STEMI                                 | 133 (11.5%)            | 24 (11.1%)            | 0.88   | 434 (6.6%)             | 100 (5.9%)             | 0.25   | 146 (5.6%)              | 74 (6.0%)               | 0.68   |
| NSTEMI                                | 307 (26.4%)            | 68 (31.5%)            | 0.13   | 1282 (19.6%)           | 334 (19.6%)            | 0.99   | 607 (23.4%)             | 323 (26.0%)             | 0.077  |
| Unstable angina                       | 206 (17.7%)            | 35 (16.2%)            | 0.58   | 1030 (15.7%)           | 281 (16.5%)            | 0.46   | 426 (16.4%)             | 238 (19.2%)             | 0.035  |

CAD-coronary artery disease; BMI-Body mass index; HF-Heart failure; PVD-Peripheral vascular disease; CeVD-Cerebrovascular disease; CABG-Coronary artery bypass grafting; MI-Myocardial infarction;; STEMI-ST-elevation myocardial infarction; NSTEMI-Non-ST-elevated myocardial infarction; SD-Standard deviation.

<sup>1</sup>Renal failure/impairment is defined as either (a) Sr. Creatinine >2mg/dl and/or (b) having renal failure/receiving dialysis.

**Supplementary Table S2 Procedural characteristics by sex and age**

| Variables                               | Age <55yr             |                      |        | Age 55-74 yrs         |                       |        | Age ≥75 yrs           |                       |        |
|-----------------------------------------|-----------------------|----------------------|--------|-----------------------|-----------------------|--------|-----------------------|-----------------------|--------|
|                                         | Male                  | Female               | p      | Male                  | Female                | p      | Male                  | Female                | p      |
| <b>N</b>                                | <b>1192</b>           | <b>221</b>           |        | <b>6770</b>           | <b>1790</b>           |        | <b>2715</b>           | <b>1286</b>           |        |
| Average lesion per procedure, mean (SD) | 1.4 (0.7)<br>(n=1191) | 1.3 (0.5)<br>(n=218) | 0.006  | 1.4 (0.6)<br>(n=6740) | 1.3 (0.6)<br>(n=1774) | <0.001 | 1.4 (0.7)<br>(n=2697) | 1.4 (0.6)<br>(n=1277) | 0.11   |
| Disease extent multivessel              | 486 (41.0%)           | 73 (33.2%)           | 0.029  | 3022 (44.9%)          | 646 (36.4%)           | <0.001 | 1404 (52.1%)          | 553 (43.2%)           | <0.001 |
| Lesion access site                      |                       |                      |        |                       |                       |        |                       |                       |        |
| Femoral                                 | 692 (58.2%)           | 145 (65.6%)          | 0.039  | 3805 (56.5%)          | 1004 (56.6%)          | 0.94   | 1578 (58.6%)          | 795 (62.4%)           | 0.024  |
| Radial                                  | 492 (41.4%)           | 76 (34.4%)           | 0.052  | 2907 (43.2%)          | 765 (43.1%)           | 0.98   | 1104 (41.0%)          | 477 (37.4%)           | 0.031  |
| Brachial                                | 5 (0.4%)              | 0 (0.0%)             | 0.33   | 19 (0.3%)             | 4 (0.2%)              | 0.68   | 10 (0.4%)             | 3 (0.2%)              | 0.48   |
| Coronary Lesion                         |                       |                      |        |                       |                       |        |                       |                       |        |
| De Novo                                 | 1083 (90.9%)          | 182 (82.4%)          | <0.001 | 5814 (85.9%)          | 1457 (81.4%)          | <0.001 | 2220 (81.8%)          | 1038 (80.7%)          | 0.42   |
| In stent restenosis                     | 49 (4.1%)             | 16 (7.2%)            | 0.041  | 316 (4.7%)            | 72 (4.0%)             | 0.24   | 159 (5.9%)            | 59 (4.6%)             | 0.099  |
| Restenosis                              | 10 (0.8%)             | 0 (0.0%)             | 0.17   | 27 (0.4%)             | 8 (0.4%)              | 0.78   | 15 (0.6%)             | 3 (0.2%)              | 0.16   |
| Other                                   | 5 (0.4%)              | 0 (0.0%)             | 0.33   | 67 (1.0%)             | 13 (0.7%)             | 0.30   | 59 (2.2%)             | 11 (0.9%)             | 0.003  |
| ACC/AHA Morphology                      |                       |                      |        |                       |                       |        |                       |                       |        |
| A                                       | 140 (11.8%)           | 43 (19.7%)           | 0.001  | 804 (11.9%)           | 223 (12.6%)           | 0.46   | 229 (8.5%)            | 120 (9.4%)            | 0.35   |
| B1                                      | 385 (32.3%)           | 63 (28.9%)           | 0.32   | 1978 (29.3%)          | 555 (31.3%)           | 0.11   | 743 (27.5%)           | 344 (26.9%)           | 0.69   |
| B2_C                                    | 539 (45.3%)           | 72 (33.0%)           | <0.001 | 2904 (43.1%)          | 636 (35.9%)           | <0.001 | 1258 (46.6%)          | 574 (44.9%)           | 0.32   |
| Target vessel                           |                       |                      |        |                       |                       |        |                       |                       |        |
| RCA                                     | 318 (26.7%)           | 60 (27.1%)           | 0.88   | 1870 (27.6%)          | 474 (26.5%)           | 0.34   | 675 (24.9%)           | 337 (26.2%)           | 0.36   |
| LMCA                                    | 6 (0.5%)              | 5 (2.3%)             | 0.006  | 84 (1.2%)             | 17 (0.9%)             | 0.31   | 65 (2.4%)             | 17 (1.3%)             | 0.025  |
| LAD                                     | 503 (42.2%)           | 90 (40.7%)           | 0.68   | 2570 (38.0%)          | 689 (38.5%)           | 0.68   | 935 (34.4%)           | 470 (36.5%)           | 0.19   |
| LCx                                     | 233 (19.5%)           | 31 (14.0%)           | 0.053  | 1273 (18.8%)          | 258 (14.4%)           | <0.001 | 552 (20.3%)           | 205 (15.9%)           | <0.001 |
| Bypass                                  | 10 (0.8%)             | 0 (0.0%)             | 0.17   | 167 (2.5%)            | 21 (1.2%)             | <0.001 | 138 (5.1%)            | 27 (2.1%)             | <0.001 |
| Total occlusion                         | 73 (6.4%)             | 4 (2.0%)             | 0.015  | 302 (4.9%)            | 66 (4.3%)             | 0.33   | 119 (4.9%)            | 36 (3.2%)             | 0.027  |
| Bifurcation lesion                      | 137 (12.0%)           | 17 (8.6%)            | 0.17   | 608 (9.8%)            | 165 (10.8%)           | 0.28   | 223 (9.1%)            | 108 (9.7%)            | 0.54   |
| FFR done                                | 79 (6.6%)             | 26 (11.8%)           | 0.007  | 907 (13.4%)           | 331 (18.5%)           | <0.001 | 391 (14.4%)           | 202 (15.7%)           | 0.28   |
| Bare metal stents (BMS)                 | 200 (18.9%)           | 21 (11.6%)           | 0.018  | 907 (15.8%)           | 225 (15.8%)           | 0.95   | 364 (16.2%)           | 222 (21.7%)           | <0.001 |
| Drug eluting stents (DES)               | 973 (92.7%)           | 173 (95.6%)          | 0.15   | 5281 (93.0%)          | 1322 (93.4%)          | 0.61   | 1972 (89.6%)          | 854 (85.9%)           | 0.003  |

| Variables                    | Age <55yr              |                       |        | Age 55-74 yrs          |                        |        | Age ≥75 yrs            |                        |        |
|------------------------------|------------------------|-----------------------|--------|------------------------|------------------------|--------|------------------------|------------------------|--------|
|                              | Male                   | Female                | p      | Male                   | Female                 | p      | Male                   | Female                 | p      |
| <b>N</b>                     | <b>1192</b>            | <b>221</b>            |        | <b>6770</b>            | <b>1790</b>            |        | <b>2715</b>            | <b>1286</b>            |        |
| Average stents per procedure | 1.5 (0.9)<br>(n=1191)  | 1.2 (0.9)<br>(n=218)  | <0.001 | 1.3 (0.9) (n=6740)     | 1.2 (0.9) (n=1774)     | <0.001 | 1.3 (0.9) (n=2697)     | 1.3 (0.9) (n=1277)     | 0.20   |
| Stent length (mm); ±SD       | 19.8 (6.8)<br>(n=1106) | 18.5 (6.0)<br>(n=188) | 0.011  | 19.3 (6.7)<br>(n=5949) | 18.7 (6.7)<br>(n=1475) | 0.001  | 19.2 (6.6)<br>(n=2327) | 18.4 (6.5)<br>(n=1062) | 0.002  |
| Stent diameter (mm); ±SD     | 3.0 (0.5)<br>(n=1106)  | 2.9 (0.4)<br>(n=188)  | <0.001 | 3.0 (0.5)<br>(n=5950)  | 2.9 (0.4)<br>(n=1475)  | <0.001 | 3.0 (0.5)<br>(n=2328)  | 2.8 (0.5)<br>(n=1062)  | <0.001 |

RCA-Right coronary artery; LMCA-Left main coronary artery; LAD-Left anterior descending artery; LCX-Left circumflex artery; FFR-Fractional flow reserve; BMS-Bare metal stent; DES-Drug-eluting stent; SD-Standard deviation.

**Supplementary Table S3:** Univariate analysis to explore association of different baseline and procedural characteristics with unplanned cardiac readmission within first year following PCI

| Variables                               | Overall |             |         | Male |             |         | Female |             |         |
|-----------------------------------------|---------|-------------|---------|------|-------------|---------|--------|-------------|---------|
|                                         | OR      | 95% CI      | P-value | OR   | 95% CI      | P-value | OR     | 95% CI      | P-value |
| Age                                     |         |             |         |      |             |         |        |             |         |
| <55yr                                   | 1       |             |         | 1    |             |         | 1      |             |         |
| 55-74y                                  | 0.83    | 0.69 - 1.00 | 0.05    | 0.86 | 0.70 - 1.06 | 0.15    | 0.69   | 0.46 - 1.03 | 0.07    |
| 75+yr                                   | 1.09    | 0.89 - 1.32 | 0.40    | 1.16 | 0.93 - 1.44 | 0.2     | 0.78   | 0.52 - 1.17 | 0.23    |
| Female                                  |         |             |         |      |             |         |        |             |         |
| No                                      | 1       |             |         |      |             |         |        |             |         |
| Yes                                     | 1.24    | 1.09-1.40   | 0.001   |      |             |         |        |             |         |
| Diabetes                                |         |             |         |      |             |         |        |             |         |
| No                                      | 1       |             |         | 1    |             |         | 1      |             |         |
| Yes                                     | 1.15    | 1.02 - 1.30 | 0.03    | 1.16 | 1.01 - 1.35 | 0.04    | 1.12   | 0.88 - 1.42 | 0.38    |
| Hypertension                            |         |             |         |      |             |         |        |             |         |
| No                                      | 1       |             |         | 1    |             |         | 1      |             |         |
| Yes                                     | 1.37    | 1.19 - 1.56 | <0.001  | 1.38 | 1.19 - 1.62 | <0.001  | 1.23   | 0.93 - 1.63 | 0.15    |
| Hypercholesterolaemia <sup>1</sup>      |         |             |         |      |             |         |        |             |         |
| No                                      | 1       |             |         | 1    |             |         | 1      |             |         |
| Yes                                     | 1.10    | 0.92 - 1.30 | 0.29    | 1.07 | 0.88 - 1.30 | 0.49    | 1.13   | 0.79 - 1.62 | 0.5     |
| CAD Family history                      |         |             |         |      |             |         |        |             |         |
| No                                      | 1       |             |         | 1    |             |         | 1      |             |         |
| Yes                                     | 0.94    | 0.83 - 1.05 | 0.27    | 0.97 | 0.84 - 1.11 | 0.64    | 0.84   | 0.67 - 1.06 | 0.15    |
| Smoking history                         |         |             |         |      |             |         |        |             |         |
| Never smoked                            | 1       |             |         | 1    |             |         | 1      |             |         |
| Previously smoked                       | 1.07    | 0.95 - 1.20 | 0.26    | 1.1  | 0.96 - 1.26 | 0.18    | 1.14   | 0.90 - 1.45 | 0.26    |
| Currently smoking                       | 0.89    | 0.71 - 1.11 | 0.29    | 0.95 | 0.74 - 1.22 | 0.68    | 0.79   | 0.50 - 1.27 | 0.33    |
| BMI, (per kg/m <sup>2</sup> )           | 1.00    | 0.99 - 1.01 | 0.71    | 1    | 0.99 - 1.02 | 0.72    | 0.99   | 0.97 - 1.01 | 0.35    |
| Heart Failure anytime (chronic/current) |         |             |         |      |             |         |        |             |         |
| No                                      | 1       |             |         | 1    |             |         | 1      |             |         |
| Yes                                     | 1.65    | 1.37 - 1.99 | <0.001  | 1.79 | 1.44 - 2.23 | <0.001  | 1.31   | 0.92 - 1.87 | 0.14    |
| LVEF                                    | 0.99    | 0.99 - 1.00 | 0.003   | 0.99 | 0.98 - 0.99 | <0.001  | 1      | 0.99 - 1.01 | 0.74    |
| Previous MI                             |         |             |         |      |             |         |        |             |         |

| Variables                      | Overall |             |         | Male |             |         | Female |             |         |
|--------------------------------|---------|-------------|---------|------|-------------|---------|--------|-------------|---------|
|                                | OR      | 95% CI      | P-value | OR   | 95% CI      | P-value | OR     | 95% CI      | P-value |
| No                             | 1       |             |         | 1    |             |         | 1      |             |         |
| Yes                            | 1.30    | 1.15 - 1.48 | <0.001  | 1.32 | 1.14 - 1.52 | <0.001  | 1.33   | 1.03 - 1.73 | 0.03    |
| Previous PCI                   |         |             |         |      |             |         |        |             |         |
| No                             | 1       |             |         | 1    |             |         | 1      |             |         |
| Yes                            | 1.24    | 1.11 - 1.39 | <0.001  | 1.19 | 1.04 - 1.36 | 0.01    | 1.46   | 1.17 - 1.83 | <0.001  |
| Previous PVD                   |         |             |         |      |             |         |        |             |         |
| No                             | 1       |             |         | 1    |             |         | 1      |             |         |
| Yes                            | 1.51    | 1.25 - 1.82 | <0.001  | 1.57 | 1.27 - 1.95 | <0.001  | 1.33   | 0.93 - 1.90 | 0.12    |
| Previous CeVD                  |         |             |         |      |             |         |        |             |         |
| No                             | 1       |             |         | 1    |             |         | 1      |             |         |
| Yes                            | 1.61    | 1.34 - 1.95 | <0.001  | 1.65 | 1.32 - 2.06 | <0.001  | 1.48   | 1.05 - 2.09 | 0.03    |
| Previous CABG                  |         |             |         |      |             |         |        |             |         |
| No                             | 1       |             |         | 1    |             |         | 1      |             |         |
| Yes                            | 1.90    | 1.63 - 2.20 | <0.001  | 1.88 | 1.59 - 2.23 | <0.001  | 2.18   | 1.57 - 3.03 | <0.001  |
| Atrial Fibrillation            |         |             |         |      |             |         |        |             |         |
| No                             | 1       |             |         | 1    |             |         | 1      |             |         |
| Yes                            | 1.96    | 1.68 - 2.28 | <0.001  | 1.94 | 1.62 - 2.33 | <0.001  | 1.96   | 1.47 - 2.62 | <0.001  |
| Renal dysfunction <sup>2</sup> |         |             |         |      |             |         |        |             |         |
| No                             | 1       |             |         | 1    |             |         | 1      |             |         |
| Yes                            | 1.46    | 1.17 - 1.82 | <0.001  | 1.6  | 1.25 - 2.06 | <0.001  | 1.1    | 0.68 - 1.76 | 0.7     |
| Clinical presentation          |         |             |         |      |             |         |        |             |         |
| STEMI                          | 1       |             |         | 1    |             |         | 1      |             |         |
| NSTEMI                         | 1.42    | 1.09 - 1.86 | 0.01    | 1.5  | 1.10 - 2.05 | 0.01    | 1.2    | 0.73 - 1.99 | 0.47    |
| UAP                            | 1.71    | 1.31 - 2.24 | <0.001  | 1.77 | 1.29 - 2.44 | <0.001  | 1.52   | 0.91 - 2.52 | 0.11    |
| Elective                       | 1.17    | 0.91 - 1.50 | 0.23    | 1.24 | 0.92 - 1.67 | 0.16    | 0.98   | 0.61 - 1.58 | 0.93    |
| Cardiogenic Shock              |         |             |         |      |             |         |        |             |         |
| No                             | 1       |             |         | 1    |             |         | 1      |             |         |
| Yes                            | 0.89    | 0.32 - 2.50 | 0.83    | 1.51 | 0.52 - 4.35 | 0.44    | 1      | 1.00 - 1.00 |         |
| Lesion access site             |         |             |         |      |             |         |        |             |         |
| Brachial                       | 1       |             |         | 1    |             |         | 1      |             |         |
| Radial                         | 1.18    | 0.36 - 3.83 | 0.78    | 1.46 | 0.35 - 6.13 | 0.6     | 0.59   | 0.07 - 4.96 | 0.63    |
| Femoral                        | 1.59    | 0.49 - 5.15 | 0.44    | 1.86 | 0.45 - 7.79 | 0.39    | 0.92   | 0.11 - 7.70 | 0.94    |
| Coronary Lesion                |         |             |         |      |             |         |        |             |         |

| Variables                       | Overall |             |         | Male |             |         | Female |              |         |
|---------------------------------|---------|-------------|---------|------|-------------|---------|--------|--------------|---------|
|                                 | OR      | 95% CI      | P-value | OR   | 95% CI      | P-value | OR     | 95% CI       | P-value |
| De Novo                         | 1       |             |         | 1    |             |         | 1      |              |         |
| In stent restenosis             | 1.85    | 1.50 - 2.29 | <0.001  | 1.64 | 1.27 - 2.11 | <0.001  | 2.61   | 1.76 - 3.86  | <0.001  |
| Restenosis                      | 1.33    | 0.63 - 2.80 | 0.45    | 1.26 | 0.54 - 2.96 | 0.6     | 1.72   | 0.37 - 8.01  | 0.49    |
| Other DeNovo                    | 1.66    | 0.90 - 3.08 | 0.11    | 1.61 | 0.79 - 3.27 | 0.19    | 1.94   | 0.54 - 6.91  | 0.31    |
| Chronic lesion                  | 1.06    | 0.42 - 2.69 | 0.90    | 1.27 | 0.50 - 3.23 | 0.62    | 1      | 1.00 - 1.00  |         |
| Stent thrombosis                | 1.02    | 0.31 - 3.35 | 0.98    | 0.8  | 0.19 - 3.41 | 0.77    | 2.59   | 0.27 - 24.93 | 0.41    |
| ACC/AHA Morphology              |         |             |         |      |             |         |        |              |         |
| A                               | 1       |             |         | 1    |             |         | 1      |              |         |
| B1                              | 0.97    | 0.80 - 1.17 | 0.74    | 1.06 | 0.84 - 1.34 | 0.62    | 0.8    | 0.57 - 1.13  | 0.21    |
| B2_C                            | 0.99    | 0.82 - 1.19 | 0.89    | 1.16 | 0.93 - 1.44 | 0.2     | 0.69   | 0.49 - 0.96  | 0.03    |
| Target vessel                   |         |             |         |      |             |         |        |              |         |
| RCA_any                         | 1       |             |         | 1    |             |         | 1      |              |         |
| LMCA                            | 1.57    | 1.02 - 2.41 | 0.04    | 1.38 | 0.83 - 2.30 | 0.21    | 2.36   | 1.05 - 5.29  | 0.04    |
| LAD_any                         | 1.07    | 0.93 - 1.24 | 0.36    | 1.01 | 0.86 - 1.20 | 0.87    | 1.23   | 0.93 - 1.63  | 0.15    |
| LCxany                          | 1.22    | 1.03 - 1.45 | 0.02    | 1.21 | 1.00 - 1.47 | 0.05    | 1.3    | 0.92 - 1.84  | 0.14    |
| Bypass                          | 2.51    | 1.90 - 3.33 | <0.001  | 2.42 | 1.78 - 3.31 | <0.001  | 3.39   | 1.73 - 6.65  | <0.001  |
| Total occlusion                 |         |             |         |      |             |         |        |              |         |
| No                              | 1       |             |         | 1    |             |         | 1      |              |         |
| Yes                             | 1.07    | 0.83 - 1.39 | 0.60    | 1.06 | 0.79 - 1.43 | 0.69    | 1.17   | 0.67 - 2.05  | 0.57    |
| Disease extent multivessel      |         |             |         |      |             |         |        |              |         |
| No                              | 1       |             |         | 1    |             |         | 1      |              |         |
| Yes                             | 1.15    | 1.03 - 1.28 | 0.02    | 1.17 | 1.02 - 1.33 | 0.02    | 1.15   | 0.93 - 1.43  | 0.2     |
| Bifurcation lesion              |         |             |         |      |             |         |        |              |         |
| No                              | 1       |             |         | 1    |             |         | 1      |              |         |
| Yes                             | 1.09    | 0.91 - 1.32 | 0.34    | 1.12 | 0.91 - 1.40 | 0.28    | 1.01   | 0.70 - 1.46  | 0.96    |
| Stent type -BMS/DES             |         |             |         |      |             |         |        |              |         |
| BMS only                        | 1       |             |         | 1    |             |         | 1      |              |         |
| DES any                         | 0.81    | 0.66 - 0.99 | 0.04    | 0.78 | 0.61 - 1.00 | 0.05    | 0.89   | 0.60 - 1.32  | 0.58    |
| Stent # by Procedure, mean (SD) | 1.00    | 0.94 - 1.06 | 0.90    | 0.97 | 0.90 - 1.04 | 0.37    | 1.1    | 0.98 - 1.23  | 0.11    |
| Avr Stent length, mean (SD)     | 0.99    | 0.99 - 1.00 | 0.27    | 1.00 | 0.98 - 1.01 | 0.37    | 1.00   | 0.98 - 1.02  | 0.79    |
| Avr Stent diameter, mean (SD)   | 0.82    | 0.73 - 0.93 | 0.00    | 0.88 | 0.76 - 1.01 | 0.07    | 0.75   | 0.58 - 0.98  | 0.04    |

CAD-coronary artery disease; BMI-Body mass index; HF-Heart failure; LVEF-Left ventricular ejection fraction; PVD-Peripheral vascular disease; CeVD-Cerebrovascular disease; CABG-Coronary artery bypass grafting; MI-Myocardial infarction; eGFR-estimated Glomerular Filtration Rate; IABP-Intra-aortic balloon pump therapy; STEMI-ST-elevation myocardial infarction; NSTEMI-Non-ST-elevated myocardial infarction; UAP-Unstable angina; RCA-Right coronary artery; LMCA-Left main coronary artery; LAD-Left anterior descending artery; LCX-Left circumflex artery; BMS-Bare metal stent; DES-Drug-eluting stent; SD-Standard deviation. SD-Standard deviation.

<sup>1</sup>Hypercholesterolaemia is defined as either (a) Cholesterol level >5.2 and/or (b) Receiving medication

<sup>2</sup>Renal failure/impairment is defined as either (a) Sr. Creatinine >2mg/dl and/or (b) having renal failure/receiving dialysis.



Supplementary Table S4: Distribution of all-cause mortality (between 1 and 2 yr) by unplanned cardiac readmission status in first year following PCI

|         | <b>Overall</b>   | <b>No unplanned<br/>readmission in year-1</b> | <b>Unplanned<br/>readmission in year-1</b> | <b>P-value</b> |
|---------|------------------|-----------------------------------------------|--------------------------------------------|----------------|
| Overall | 186/12744 (1.5%) | 140/11474 (1.2%)                              | 46/1270 (3.6%)                             | <0.001         |
| Male    | 127/9738 (1.3%)  | 96/8809 (1.1%)                                | 31/929 (3.3%)                              | <0.001         |
| Female  | 59/3001 (2.0%)   | 44/2660 (1.7%)                                | 15/341 (4.4%)                              | 0.001          |
